# Supplementary material
Source: PubMed Central journal article supplement (PMC6129515)
Supplement: ajtr0010-2579-f6.pdf [file ajtr0010-2579-f6.pdf]

## miRNA-7702 in colorectal cancer

**Supplementary Table 1.** MicroRNAs related to colorectal cancer from TCGA database

| COAD related miRNAs | COAD NO related miRNAs | COAD N+ related miRNAs |
|---------------------|------------------------|------------------------|
| hsa-mir-142         | hsa-mir-142            | hsa-mir-19a            |
| hsa-mir-19a         | hsa-mir-374a           | hsa-mir-374a           |
| hsa-mir-374a        | hsa-mir-19a            | hsa-mir-142            |
| hsa-mir-21          | hsa-mir-21             | hsa-mir-628            |
| hsa-mir-19b-1       | hsa-mir-19b-1          | hsa-mir-19b-1          |
| hsa-mir-590         | hsa-mir-203b           | hsa-mir-19b-2          |
| hsa-mir-628         | hsa-mir-101-1          | hsa-mir-29b-1          |
| hsa-mir-19b-2       | hsa-mir-101-2          | hsa-mir-21             |
| hsa-mir-29b-1       | hsa-mir-19b-2          | hsa-mir-1296           |
| hsa-mir-135b        | hsa-mir-29b-1          | hsa-mir-590            |
| hsa-mir-144         | hsa-mir-542            | hsa-mir-424            |
| hsa-mir-101-1       | hsa-mir-590            | hsa-mir-144            |
| hsa-mir-101-2       | hsa-mir-628            | hsa-mir-150            |
| hsa-mir-542         | hsa-mir-301a           | hsa-mir-141            |
| hsa-mir-450b        | hsa-mir-144            | hsa-mir-20a            |
| hsa-mir-141         | hsa-mir-135b           | hsa-mir-153-2          |
| hsa-mir-203a        | hsa-mir-582            | hsa-mir-182            |
| hsa-mir-424         | hsa-mir-153-2          | hsa-mir-101-1          |
| hsa-mir-20a         | hsa-mir-203a           | hsa-mir-335            |
| hsa-mir-301a        | hsa-mir-450b           | hsa-mir-542            |
| hsa-mir-182         | hsa-mir-379            | hsa-mir-129-2          |
| hsa-mir-335         | hsa-mir-182            | hsa-mir-197            |
| hsa-mir-153-2       | hsa-mir-424            | hsa-mir-328            |
| hsa-mir-653         | hsa-mir-141            | hsa-mir-101-2          |
| hsa-mir-126         | hsa-mir-335            | hsa-mir-126            |
| hsa-mir-16-2        | hsa-mir-16-1           | hsa-mir-135b           |
| hsa-mir-16-1        | hsa-mir-126            | hsa-mir-16-2           |
| hsa-mir-203b        | hsa-mir-148a           | hsa-mir-98             |
| hsa-mir-148a        | hsa-mir-16-2           | hsa-mir-136            |
| hsa-mir-379         | hsa-mir-136            | hsa-mir-106a           |
| hsa-mir-2355        | hsa-mir-199b           | hsa-mir-129-1          |
| hsa-mir-582         | hsa-mir-2355           | hsa-mir-1976           |
| hsa-mir-592         | hsa-mir-653            | hsa-mir-148a           |
| hsa-mir-96          | hsa-mir-152            | hsa-mir-592            |
| hsa-mir-136         | hsa-mir-889            | hsa-mir-16-1           |
| hsa-mir-106a        | hsa-mir-592            | hsa-mir-3173           |
| hsa-mir-152         | hsa-mir-96             | hsa-mir-205            |
| hsa-mir-199b        | hsa-mir-20a            | hsa-mir-452            |
| hsa-mir-452         | hsa-mir-106a           | hsa-mir-429            |
| hsa-mir-98          | hsa-mir-4677           | hsa-mir-2355           |
| hsa-mir-1-1         | hsa-mir-452            | hsa-mir-653            |
| hsa-mir-218-2       | hsa-mir-552            | hsa-mir-450b           |
| hsa-mir-454         | hsa-mir-98             | hsa-mir-203a           |
| hsa-mir-217         | hsa-mir-708            | hsa-mir-92b            |
| hsa-mir-1-2         | hsa-mir-199a-2         | hsa-mir-486-2          |
| hsa-mir-577         | hsa-mir-411            | hsa-mir-486-1          |
| hsa-mir-889         | hsa-mir-218-2          | hsa-mir-217            |
| hsa-mir-199a-2      | hsa-mir-486-1          | hsa-mir-766            |
| hsa-mir-4677        | hsa-mir-486-2          | hsa-mir-152            |

## miRNA-7702 in colorectal cancer

|                 |                 |                |
|-----------------|-----------------|----------------|
| hsa-mir-486-1   | hsa-mir-374b    | hsa-mir-96     |
| hsa-mir-486-2   | hsa-mir-454     | hsa-mir-7702   |
| hsa-mir-15a     | hsa-mir-1-1     | hsa-mir-379    |
| hsa-mir-3613    | hsa-mir-217     | hsa-mir-1180   |
| hsa-mir-552     | hsa-mir-1-2     | hsa-mir-17     |
| hsa-mir-429     | hsa-mir-29b-2   | hsa-mir-296    |
| hsa-mir-17      | hsa-mir-199a-1  | hsa-mir-183    |
| hsa-mir-374b    | hsa-mir-15a     | hsa-let-7f-1   |
| hsa-mir-29b-2   | hsa-mir-660     | hsa-mir-577    |
| hsa-mir-660     | hsa-mir-17      | hsa-mir-15a    |
| hsa-mir-4668    | hsa-mir-3613    | hsa-mir-3613   |
| hsa-mir-10a     | hsa-mir-32      | hsa-mir-196b   |
| hsa-mir-32      | hsa-mir-10a     | hsa-let-7f-2   |
| hsa-mir-183     | hsa-mir-374c    | hsa-mir-508    |
| hsa-mir-411     | hsa-mir-577     | hsa-mir-125a   |
| hsa-mir-199a-1  | hsa-mir-651     | hsa-mir-1224   |
| hsa-mir-6803    | hsa-mir-10b     | hsa-mir-218-2  |
| hsa-mir-374c    | hsa-mir-139     | hsa-mir-874    |
| hsa-mir-196b    | hsa-mir-4728    | hsa-mir-369    |
| hsa-mir-450a-2  | hsa-mir-429     | hsa-mir-1306   |
| hsa-mir-708     | hsa-mir-1343    | hsa-mir-582    |
| hsa-let-7f-1    | hsa-mir-1976    | hsa-mir-193b   |
| hsa-mir-1976    | hsa-mir-4662a   | hsa-mir-301a   |
| hsa-let-7f-2    | hsa-mir-143     | hsa-mir-3150b  |
| hsa-mir-143     | hsa-mir-197     | hsa-mir-181a-1 |
| hsa-mir-197     | hsa-mir-192     | hsa-mir-574    |
| hsa-mir-10b     | hsa-mir-301b    | hsa-mir-199b   |
| hsa-mir-139     | hsa-mir-183     | hsa-mir-1-1    |
| hsa-mir-129-1   | hsa-mir-196b    | hsa-mir-139    |
| hsa-mir-6511b-1 | hsa-let-7f-1    |                |
| hsa-mir-4728    | hsa-mir-496     |                |
| hsa-mir-1343    | hsa-let-7f-2    |                |
| hsa-mir-7641-1  | hsa-mir-7641-1  |                |
| hsa-mir-1277    | hsa-mir-6511b-1 |                |
| hsa-mir-129-2   |                 |                |
| hsa-mir-1180    |                 |                |
| hsa-mir-328     |                 |                |
| hsa-mir-3127    |                 |                |
| hsa-mir-549a    |                 |                |
| hsa-mir-1306    |                 |                |
| hsa-mir-6507    |                 |                |
| hsa-mir-150     |                 |                |
| hsa-mir-1245a   |                 |                |
| hsa-mir-196a-2  |                 |                |
| hsa-mir-651     |                 |                |
| hsa-mir-223     |                 |                |
| hsa-mir-30e     |                 |                |
| hsa-mir-766     |                 |                |
| hsa-mir-338     |                 |                |
| hsa-mir-450a-1  |                 |                |
| hsa-mir-4676    |                 |                |

---
